# Supplementary material for: Colorful humidity sensitive photonic crystal hydrogel
Source: Royal Society of Chemistry journal article supplement (doi:10.1039/b717368g), 2008-01-01
Supplement: b717368g.pdf [file b717368g.pdf]

**Supporting Information For:**  
**Colorful Humidity-sensitive Photonic Crystal Hydrogel**

Entao Tian, Jingxia Wang, Yongmei Zheng, Yanlin Song, Lei Jiang and Daoben Zhu

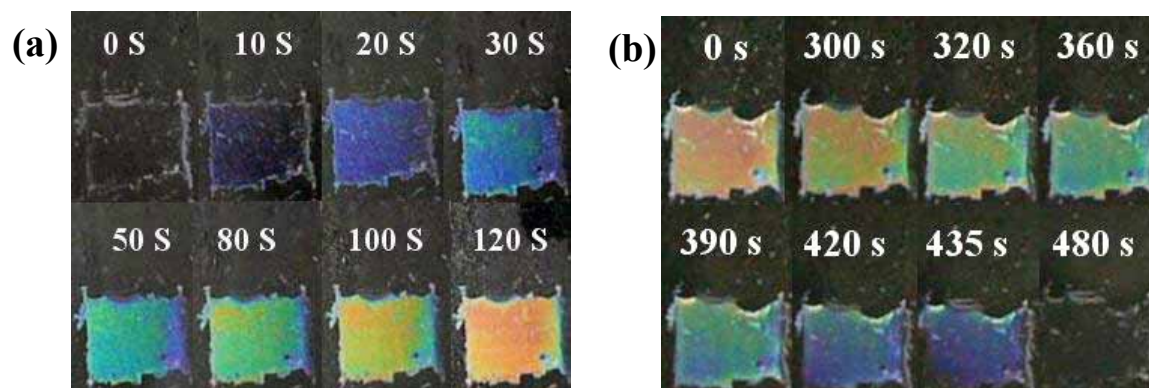

**Figure. S1** Time-dependent color change of the photonic crystal hydrogel. (a) The dry film was exposed to the water vapor; (b) the wetted film was put in the dry atmosphere at 15 °C

When the film is exposed to water vapor,<sup>1</sup> the color changes from transparent to violet, blue, cyan, green, yellow and orange with the increasing exposure time. Vice versa, its color reversibly returns to transparent in the dry atmosphere at 15 °C.

**Reference:**

1. N. A. Luechinger, S. Loher, E. K. Athanassiou, R. N. Grass, W. J. Stark *Langmuir* 2007, 23, 3473.
